# Supplementary material for: Viral Linkage in HIV-1 Seroconverters and Their Partners in an HIV-1 Prevention Clinical Trial
Source: PLoS One. 2011 Mar 2;6(3):e16986. doi: 10.1371/journal.pone.0016986 (PMC3047537; doi:10.1371/journal.pone.0016986)
Supplement: Table S1 — Summary of HIV-1 Transmission Linkage and Local Control Sequence Data. Demographic, sequence, and linkage data for each couple and “local control” participant. Pairwise nucleotide distances shown are the smallest pairwise distances obtained, from either consensus or single molecule sequencing in env or consensus sequencing in gag, with Bayesian posterior probabilities corresponding to the distances shown. (XLS) [file pone.0016986.s005.xls]

## Sheet: Sheet1
	Supplementary Table S1: Summary of HIV-1 Transmission Linkage & Local Control (LC) Sequence Data
Study Region			Genetic Region											Final Adjudication
			Env							Gag
East Africa	Partner Pair or LC ID	Index Gender	Viral Subtype	Monophyletic	Pairwise Genetic Distance	Bayesian Posterior Probability	# SM Env	# Linked SM Env	# Pyro-sequence Templates	Viral Subtype	Monophyletic	Pairwise Genetic Distance	Bayesian Posterior Probability
Kenya
Site 1	PP88A	Female	A	Yes	0.0197	0.99858				A	Yes	0.0301236	0.95317	Linked
	PP88B		A							A
Site 1	PP89A	Female	A	Yes	0.0683	0.90154				A	Yes	0.0210836	0.98608	Linked
	PP89B		A							A
Site 1	PP126A	Male	D	Yes	0.0286404	0.99622				CRF10	Yes	0.00631602	0.99873	Linked
	PP126B		D							CRF10
Site 1	PP127A	Female	A	Yes	0.0861477	0.7795				A	Yes	0.0031936	0.99702	Linked
	PP127B		A							A
Site 1	PP129A	Male	D	Yes	0.0736562	0.88484				D	Yes	0.0391592	0.92174	Linked
	PP129B		D							D
Site 1	SC17A	Male	PCR-	-	-	-				A	Yes	0	0.99446	Linked
	SC17B		C	-	-	-				A/C
Site 1-LC	BKG02	Female	A							CRF10
Site 1-LC	BKG03	Female	D							A/D/G
Site 1-LC	BKG010	Female	D							A/D
Site 1-LC	BKG012	Female	C							A
Site 1-LC	BKG013	Male	A							A
Site 2	PP38A	Male	G	Yes	0.0186188	0.99895				-	-	-	-	Linked
	PP38B		G							-	-	-	-
Site 2	PP39A	Female	A	Yes	0.0447542	0.98306				A	Yes	0.0389616	0.92357	Linked
	PP39B		A							A
Site 2	PP40A	Female	A	No	0.1804	2e-05	19	0		A	No	0.216427	0	Unlinked
	PP40B		A							A
Site 2	PP41A	Male	A	Yes	0.0021425	1				A/D	Yes	0.0427939	0.8363	Linked
	PP41B		A							A
Site 2	PP42A	Female	D	Yes	0	1				D	Yes	0.0296174	0.95526	Linked
	PP42B		D							D
Site 2	PP43A	Male	A	No	0.142421	0.0066	10	0	197	A	No	0.128591	0	Unlinked
	PP43B		A							A
Site 2	PP44A	Male	A	Yes	0.07669	0.52375				A	Yes	0.0360033	0.93592	Linked
	PP44B		A							A
Site 2	PP45A	Female	A	No	0.20205	0				A	No	0.0612275	0	Unlinked
	PP45B		A							A
Site 2	PP46A	Female	C	Yes	0.0281012	0.99807				D	Yes	0.011299	0.99925	Linked
	PP46B		C							D
Site 2	PP47A	Female	D	Yes	0.0819449	0.45764				D	Yes	0.0170977	0.99503	Linked
	PP47B		D							D
Site 2	PP48A	Male	C	Yes	0.011986	0.99941				CRF10	Yes	0.0161886	0.99633	Linked
	PP48B		C							CRF10
Site 2	PP73A	Female	A	Yes	0.0203	0.99848				A	Yes	0.0150191	0.99756	Linked
	PP73B		A							A
Site 2	PP74A	Male	A	No	0.131466	0.02973	34	0	59	A	No	0.100834	0	Unlinked
	PP74B		A							A
Site 2	PP75A	Female	A	No	0.155976	0.00111	33	0		A	No	0.0896381	0	Unlinked
	PP75B		A							A
Site 2	PP76A	Male	A	Yes	0.0101	0.99953				A	Yes	0.0157389	0.99685	Linked
	PP76B		A							A
Site 2	PP77A	Male	D	-	-	-				A	-	-	-	western blot -
	PP77B		PCR-	-	-	-				PCR-	-	-	-
Site 2	PP78A	Male	C	Yes	0.0199986	0.99853				C	Yes	0.0117641	0.99914	Linked
	PP78B		C							C
Site 2	PP79A	Female	C	No	0.263173	0	11	0	78	A	No	0.116924	0	Unlinked
	PP79B		A							A
Site 2	PP80A	Female	A	Yes	0.0365	0.99194				A	Yes	0.00608239	0.9988	Linked
	PP80B		A							A
Site 2	PP81A	Male	D	No	0.243361	0	8	0	151	A/D	No	0.144881	0	Unlinked
	PP81B		A							A
Site 2	PP82A	Male	A	Yes	0.0079	0.99963				CRF10	Yes	0.0243685	0.97649	Linked
	PP82B		A							CRF10
Site 2	PP83A	Female	D	No	0.247655	0	41	0		D	No	0.16413	0	Unlinked
	PP83B		A							A
Site 2	PP84A	Male	A	Yes	0.0130314	0.99935				A	Yes	0.00642911	0.99903	Linked
	PP84B		A							A
Site 2	PP85A	Female	A	Yes	0.0518542	0.97034				A/C/D	Yes	0.0110431	0.99932	Linked
	PP85B		A							A/C/D
Site 2	PP86A	Female	A	Yes	0.02	0.99853				CRF10	Yes	0.0136766	0.99856	Linked
	PP86B		A							CRF10
Site 2	PP87A	Male	A	Yes	0.0179	0.99884				A	Yes	0.00549992	0.99843	Linked
	PP87B		A							A
Site 2	PP116A	Female	A	No	0.189792	0			1313	A	No	0.075682	0	Unlinked
	PP116B		A							A
Site 2	PP117A	Male	A	No	0.279055	0			167	A	No	0.123169	0	Unlinked
	PP117B		C							CRF16
Site 2	PP122A	Female	D	No	0.229612	0				A	No	0.163584	0	Unlinked
	PP122B		G							G
Site 2	PP123A	Male	A	-	-	-				A	-	-	-	western blot -
	PP123B		PCR-	-	-	-				PCR-	-	-	-
Site 2	PP124A	Male	A	Yes	0.04948	0.97521				A	Yes	0.0010697	0.99538	Linked
	PP124B		A							A
Site 2	PP125A	Female	A	Yes	0.0515863	0.96662				A	Yes	0.0244902	0.97608	Linked
	PP125B		A							A
Site 2	PP128A	Male	A	No	0.174721	6e-05				PCR-	-	-	-	Unlinked
	PP128B		A							A	-	-	-
Site 2	PP132A	Female	A	No	0.182754	1e-05				A	No	0.113098	0	Unlinked
	PP132B		A							A
Site 2	PP135A	Female	A	No	0.129703	0.03773	46	0		A	Yes	0.0307524	0.95011	Linked
	PP135B		A							A
Site 2	PP136A	Male	PCR-	-	-	-				A	Yes	0.0256792	0.97144	Linked
	PP136B		A	-	-	-				A
Site 2	SC11A	Male	A	Yes	0.004	0.99977				A	Yes	0.0178892	0.99371	Linked
	SC11B		A							A
Site 2	SC12A	Male	PCR-	-	-	-				A	Yes	0.0235957	0.97887	Linked
	SC12B		A	-	-	-				A
Site 2	SC13A	Male	A	-	-	-				A	Yes	0.00933513	0.99947	Linked
	SC13B		PCR-	-	-	-				A
Site 2	SC14A	Female	A	Yes	0	0.99985				A	Yes	0.00718239	0.9993	Linked
	SC14B		A							A
Site 2	SC15A	Female	C	No	0.241855	0				C	No	0.141016	0	Unlinked
	SC15B		A							CRF10/D
Site 2	SC16A	Female	A	Yes	0	0.99985				A	Yes	0.0276251	0.9621	Linked
	SC16B		A							A
Site 3	PP4A	Female	16C:1A	No:Yes	0.3414: 0.1879	0.0000:0.0000	16	0		A	No	0.0789444	0	Indeterminate
	PP4B		A							A
Site 3	PP5A	Female	A	No	0.257169	0	24	0		A/C	No	0.131153	0	Unlinked
	PP5B		A							A
Site 3	PP61A	Male	A	Yes	0.0120359	0.99941				D/G/A	Yes	0.0340388	0.93061	Linked
	PP61B		A							D/G/A
Site 3	PP62A	Female	D	Yes	0.00597949	0.99971				A/D	Yes	0.0230813	0.98039	Linked
	PP62B		D							A
Site 3	PP63A	Female	A	No	0.151068	0.00074	33	0		A	No	0.130972	0	Unlinked
	PP63B		A							A
Site 3	PP64A	Male	A	Yes	0.0107704	0.99949				A	Yes	0.0029766	0.99686	Linked
	PP64B		A							A
Site 3	PP102A	Female	A	Yes	0.0162	0.99904				A	Yes	0.00871882	0.99942	Linked
	PP102B		A							A
Site 3	PP108A	Male	D	Yes	0.0661764	0.91225				D	Yes	0.00510483	0.99818	Linked
	PP108B		D							D
Site 3	PP109A	Female	A	Yes	0.0624968	0.929				A	Yes	0.0230462	0.9805	Linked
	PP109B		A							A
Site 3	PP130A	Male	A	Yes	0.0199819	0.99854				A	-	-	-	Linked
	PP130B		A							PCR-	-	-	-
Site 3	SC2A	Female	A	No	0.102028	0.51471				A	Yes	0.0147593	0.99778	Linked
	SC2B		A							A
Site 4	PP100A	Male	A	Yes	0.0888562	0.74698				A	Yes	0.00199503	0.99612	Linked
	PP100B		A							A
Site 4	PP101A	Male	A	Yes	0.0724	0.89244				A	Yes	0.0186241	0.99231	Linked
	PP101B		A							A
Site 4	PP120A	Male	A	Yes	0.0225492	0.99805				A	Yes	0.0074625	0.99932	Linked
	PP120B		A							A
Site 4	PP133A	Female	A	Yes	0.0301481	0.99571	60	0		A	No	0.0923581	0	Linked
	PP133B		A							A
Site 4	PP134A	Female	A	Yes	0.0772782	0.86037				A	Yes	0.0259946	0.96997	Linked
	PP134B		A							A
Tanzania
Site 5	PP49A	Female	A	Yes	0.06931	0.7195				A	Yes	0.034868	0.9331	Linked
	PP49B		A							A
Site 5	PP90A	Female	A	Yes	0.0718	0.88194				A/C	Yes	0.0170828	0.99505	Linked
	PP90B		A							A/C
Site 5-LC	A0147	Female	A							A
Site 5-LC	A0687	Male	A							A
Site 5-LC	A0823	Male	A							A
Site 5-LC	A0524	Female	C							C
Site 5-LC	A0611	Male	A							CRF10
Site 5-LC	B0437	Male	A							A
Site 5-LC	BKG01	Female	C							C
Site 5-LC	BKG09	Female	D							C
Uganda
Site 6	PP26A	Female	A	No	0.345496	0	23	0		A	No	0.188671	0	Unlinked
	PP26B		D							D
Site 6	PP27A	Female	C	No	0.243636	0	3	0		A	No	0.123982	0	Unlinked
	PP27B		D							A
Site 6	PP28A	Male	D	Yes	0.0305592	0.99798				-	-	-	-	Linked
	PP28B		D							-	-	-	-
Site 6	PP29A	Female	A	Yes	0.0181314	0.99935				D	Yes	0.0121659	0.99903	Linked
	PP29B		A							D
Site 6	PP30A	Male	A	-	-	-				-	-	-	-	western blot -
	PP30B		PCR-	-	-	-				-	-	-	-
Site 6	PP31A	Female	A	-	-	-				D	-	-	-	western blot -
	PP31B		PCR-	-	-	-				PCR-	-	-	-
Site 6	PP32A	Male	D	Yes	0.0200627	0.99852				-	-	-	-	Linked
	PP32B		D							-	-	-	-
Site 6	PP33A	Female	D	Yes	0.0263372	0.99853				D	Yes	0.0134891	0.99865	Linked
	PP33B		D							D
Site 6	PP34A	Male	A	Yes	0.01597	0.99944				A	Yes	0.0148129	0.99773	Linked
	PP34B		A							A
Site 6	PP35A	Female	A	No	0.2391	0	37	0		D	No	0.148393	0	Unlinked
	PP35B		D							D
Site 6	PP67A	Female	C/D	Yes	0.0938195	0.61983	12	5		CRF10	Yes	0.0202499	0.98837	Linked
	PP67B		C/D							CRF10
Site 6	PP68A	Female	A	Yes	0.0680739	0.91551				A	Yes	0.0273562	0.96288	Linked
	PP68B		A							A
Site 6	PP103A	Male	A	No	0.256314	0	57	0		A	No	0.143929	0	Unlinked
	PP103B		D							CRF10
Site 6	PP104A	Male	D	Yes	0.0872	0.76741				CRF10	Yes	0.00976886	0.9995	Linked
	PP104B		D							CRF10
Site 6	PP105A	Male	A	Yes	0.0412	0.98755				A	Yes	0.0101063	0.99952	Linked
	PP105B		A							A
Site 6	PP110A	Female	A	No	0.156705	0.00077			68	A	No	0.112656	0	Unlinked
	PP110B		A							A
Site 6	PP111A	Female	D	No	0.271245	0			2017	D	No	0.140911	0	Unlinked
	PP111B		A							A
Site 6	PP112A	Male	A	Yes	0.0227423	0.99801				A	Yes	0.00723144	0.9993	Linked
	PP112B		A							A
Site 6	PP113A	Male	D	Yes	0.00225187	0.99981				D	Yes	0.00500919	0.99812	Linked
	PP113B		D							D
Site 6	PP114A	Female	D	Yes	0.0281676	0.9964				D	Yes	0.0109828	0.99933	Linked
	PP114B		D							D
Site 6	PP115A	Male	A	Yes	0.0206687	0.99842				A	Yes	0.0131312	0.99876	Linked
	PP115B		A							A
Site 6	PP121A	Female	A	No	0.184555	1e-05	25	0		A	No	0.0934366	0	Unlinked
	PP121B		D							A
Site 6	PP131A	Male	-	-	-	-				A	Yes	0.00214894	0.99624	Linked
	PP131B		A	-	-	-				A
Site 6	SC4A	Male	C	Yes	0.0623	0.94001				A	Yes	0.00796917	0.99936	Linked
	SC4B		C							A
Site 6	SC5A	Female	A	Yes	0.0456495	0.98175				A	Yes	0.0110323	0.99932	Linked
	SC5B		A							A
Site 6	SC6A	Male	D	Yes	0.0681437	0.91517				D	Yes	0.0576862	0	Linked
	SC6B		D							A/D
Site 6	SC7A	Male	D	Yes	0.0351959	0.99289				D	Yes	0.0101029	0.99952	Linked
	SC7B		D							D
Site 6	SC8A	Male	C	Yes	0.059	0.95134				A	Yes	0.037218	0.9384	Linked
	SC8B		C							A
Site 6	SC9A	Male	A	Yes	0.00397871	0.99977				A	Yes	0.00418041	0.99762	Linked
	SC9B		A							A
Site 6	SC10A	Female	A	Yes	0.0140818	0.99926				A	Yes	0.0129763	0.9988	Linked
	SC10B		A							A
southern Africa
Botswana
Site 7	PP36A	Male	C	No	0.112326	0.2713	44	0		C	No	0.0853152	0	Unlinked
	PP36B		C							C
Site 7	PP37A	Female	C	Yes	0.0201113	0.99873				C	Yes	0.0180868	0.99335	Linked
	PP37B		C							C
Site 7	PP69A	Male	C	-	-	-				C	Yes	0.00334524	0.99713	Linked
	PP69B		PCR-	-	-	-				C
Site 7	PP70A	Female	C	No	0.133752	0.02169	41	0		C	No	0.0890108	0	Unlinked
	PP70B		C							C
Site 7	PP71A	Female	C	Yes	0.0493723	0.97536				C	Yes	0.00098802	0.99531	Linked
	PP71B		C							C
Site 7	PP72A	Female	C	Yes	0.0475858	0.97861				C	Yes	0.00642911	0.99882	Linked
	PP72B		C							C
Site 7	PP106A	Female	C	No	0.130966	0.03181	27	0		C	No	0.0703758	0	Unlinked
	PP106B		C							C
Site 7-LC	BKG04	Female	C							C
Site 7-LC	BKG06	Female	C							C
Site 7-LC	BKG07	Female	PCR-							C
South Africa
Site 8	PP55A	Male	C	Yes	0.0165403	0.99901				C	Yes	0.00303377	0.9969	Linked
	PP55B		C							C
Site 8	PP56A	Male	C	No	0.149356	0.00263	38	0		C	No	0.117048	0	Unlinked
	PP56B		C							C
Site 8	PP57A	Female	C	Yes	0.00641933	0.99998				C	Yes	0	0.99446	Linked
	PP57B		C							C
Site 8	PP92A	Female	C	Yes	0.0891444	0.74324	17	0		C	No	0.0678796	0	Indeterminate
	PP92B		C							C
Site 8	PP93A	Female	C	No	0.153336	0.00115	12	0	306	C	No	0.109127	0	Unlinked
	PP93B		C							C
Site 8	PP94A	Female	C	No	0.142079	0.00438	29	0		C	No	0.0597878	0	Unlinked
	PP94B		C							C
Site 8	PP95A	Female	C	Yes	0.00592855	0.99971				C	Yes	0.00808702	0.99937	Linked
	PP95B		C							C
Site 8	PP96A	Female	C	Yes	0.0221153	0.99895				C	Yes	0.00427645	0.99768	Linked
	PP96B		C							C
Site 8	PP97A	Female	C	Yes	0.00204594	0.99981				C	Yes	0.00682208	0.99927	Linked
	PP97B		C							C
Site 8	PP98A	Female	C	No	0.18	2e-05	13	0	87	C	No	0.103428	0	Unlinked
	PP98B		C							C
Site 8	PP99A	Female	C	Yes	0.0120641	0.9994				C	Yes	0.0152835	0.99731	Linked
	PP99B		C							C
Site 8	PP107A	Female	C	-	-	-				C	Yes	0.010128	0.99953	Linked
	PP107B		PCR-	-	-	-				C
Site 8	PP118A	Female	C	No	0.141969	0.00729	62	0	161	C	No	0.0805478	0	Unlinked
	PP118B		C							C
Site 8	PP119A	Male	C	Yes	0.0286406	0.99622				C	Yes	0.0101669	0.99953	Linked
	PP119B		C							C
Site 8	SC18A	Female	C	Yes	0.0922717	0.69923				C	Yes	0.0193333	0.99075	Linked
	SC18B		C							C
Site 9	PP50A	Female	C	No	0.247681	0	6	0		C	No	0.0862809	0	Unlinked
	PP50B		C							C
Site 9	PP51A	Male	C	Yes	0.00303734	1				-	-	-	-	Linked
	PP51B		C							-	-	-	-
Site 9	PP52A	Female	C	Yes	0.0426025	0.98425				-	-	-	-	Linked
	PP52B		C							-	-	-	-
Site 9	PP53A	Female	C	Yes	0.0348738	0.99633				-	-	-	-	Linked
	PP53B		C							-	-	-	-
Site 9	PP54A	Female	C	Yes	0.0491163	0.94309				C	Yes	0.00956666	0.99949	Linked
	PP54B		C							C
Site 9	PP91A	Female	C	Yes	0.028416	0.99632				C	Yes	0.00446258	0.99779	Linked
	PP91B		C							C
Site 9-LC	A0311	Female	C							C
Site 9-LC	B0751	Female	PCR-							PCR-
Site 9-LC	B0262	Female	C							C
Site 9-LC	B0849	Female	C							C
Site 9-LC	BKG011	Female	C							C
Site 10	PP1A	Female	C	No	0.150473	0.00228	15	0		C	No	0.0885057	0	Unlinked
	PP1B		C							C
Site 10	PP2A	Female	C	Yes	0.015	0.99955				C	Yes	0.0184941	0.99257	Linked
	PP2B		C							C
Site 10	PP3A	Male	C	No	0.168282	0.00016	46	0		-	-	-	-	Unlinked
	PP3B		C							-	-	-	-
Site 10	PP60A	Female	C	Yes	0.0408022	0.98799				C	Yes	0.0142045	0.9982	Linked
	PP60B		C							C
Site 10	SC1A	Female	C	Yes	0.1098	0.32988				C	Yes	0.00734083	0.99931	Linked
	SC1B		C							C
Site 10-LC	B0054	Female	C							C
Site 10-LC	B0414	Male	C							C
Site 10-LC	A0099	Female	C							C
Site 10-LC	A0340	Female	C							C
Site 10-LC	A0585	Female	C							C
Zambia
Site 11	PP6A	Female	C	No	0.15252	0.00126				C	No	0.0895479	0	Unlinked
	PP6B		C							C
Site 11	PP7A	Male	C	Yes	0.00195921	0.99882				-	-	-	-	Linked
	PP7B		C							-	-	-	-
Site 11	PP8A	Female	C	Yes	0.0914761	0.68556	5	2		C	Yes	0.0060627	0.99879	Linked
	PP8B		C							C
Site 11	PP9A	Female	C	No	0.255206	0	16	0	61	C	No	0.161196	0	Indeterminate
	PP9B		A							C
Site 11	PP10A	Female	C	No	0.130696	0.02073	24	0		C	No	0.117518	0	Unlinked
	PP10B		C							C
Site 11	PP11A	Female	C	Yes	0.0164067	0.999				-	-	-	-	Linked
	PP11B		C							-	-	-	-
Site 11	PP12A	Female	C	Yes	0.0423774	0.98496				-	-	-	-	Linked
	PP12B		C							-	-	-	-
Site 11	PP13A	Male	A	Yes	0	0.99985	19	6		C	Yes	0.01732	0.99468	Linked
	PP13B		A							C
Site 11	PP14A	Male	C	No	0.144939	0.00307	14	0	61	PCR-	-	-	-	Unlinked
	PP14B		C							C	-	-	-
Site 11	PP65A	Female	C	Yes	0.0823982	0.81761				C	Yes	0.0274666	0.96256	Linked
	PP65B		C							C
Site 12	PP58A	Male	C	Yes	0.0159742	0.99938	6	2		C	Yes	0.0374013	0.93757	Linked
	PP58B		C							C
Site 12	PP59A	Male	C	Yes	0.0475544	0.95446				-	-	-	-	Linked
	PP59B		C							-	-	-	-
Site 12	SC19A	Female	C	No	0.131566	0.02932				C	No	0.0963751	0	Unlinked
	SC19B		C							C
Site 12-LC	A0280	Female	C							C
Site 12-LC	B0822	Female	C							C
Site 12-LC	B0201	Male	C							C
Site 12-LC	B0539	Male	C							C
Site 12-LC	B0815	Female	A							C
Site 12-LC	BKG08	Female	C							C
Site 12-LC	BKG05	Male	C							C
Site 13	PP15A	Female	C	Yes	0.0039797	0.9999	6	3		-	-	-	-	Linked
	PP15B		C							-	-	-	-
Site 13	PP16A	Female	C	Yes	0.0471117	0.97943	4	2	130	C	Yes	0.024227	0.97695	Linked
	PP16B		C							C
Site 13	PP17A	Female	C	Yes	0.0159018	0.99908	12	2		C	Yes	0.0225947	0.98181	Linked
	PP17B		C							C
Site 13	PP18A	Female	C	Yes	0.0182	0.99882				C	Yes	0.0226814	0.98156	Linked
	PP18B		C							C
Site 13	PP19A	Female	C	Yes	0.0124631	0.9998				-	-	-	-	Linked
	PP19B		C							-	-	-	-
Site 13	PP20A	Male	C	Yes	0.0354549	0.99536				C	Yes	0.0326594	0.93863	Linked
	PP20B		C							C
Site 13	PP21A	Male	C	Yes	0.0272612	0.99848				C	Yes	0.0305997	0.95095	Linked
	PP21B		C							C
Site 13	PP22A	Female	C	Yes	0.0484366	0.99815	7	2		C	Yes	0.00706769	0.99929	Linked
	PP22B		C							C
Site 13	PP23A	Female	C	No	0.146671	0.00247	10	0		C	No	0.0959106	0	Unlinked
	PP23B		C							C
Site 13	PP24A	Male	C	No	0.142569	0.00411	48	0		C	No	0.115763	0	Unlinked
	PP24B		C							C
Site 13	PP25A	Male	C	Yes	0.00856892	0.99982				C	Yes	0.00992661	0.99951	Linked
	PP25B		C							C
Site 13	PP66A	Male	C	Yes	0.0126938	0.9994				C	Yes	0.0041209	0.9976	Linked
	PP66B		C							C
Site 13	SC3A	Female	C	Yes	0.0857	0.78447				C	Yes	0.0130831	0.99877	Linked
	SC3B		C							C
